# Supplementary material for: ‘We just look at the well-being of the baby and not the money required’: a qualitative study exploring experiences of quality of maternity care among women in Nairobi’s informal settlements in Kenya
Source: PubMed Central journal article supplement — BMJ Open. 2020 Sep 6;10(9):e036966. doi: 10.1136/bmjopen-2020-036966 (PMC7478011; doi:10.1136/bmjopen-2020-036966), 2020-09-06
Supplement: bmjopen-2020-036966supp001.pdf [file bmjopen-2020-036966supp001.pdf]

**Appendix 1 table 1. Study sites operational characteristics and common features**

| Demographic features                                             | Health facility 1                                                                                                                                           | Health facility 2                                                                                            | Health facility 3                                                                                                                 | Health facility 4                                                                                                                                                                 | Health facility 5                                                                           | Health facility 6                                                                                                               |
|------------------------------------------------------------------|-------------------------------------------------------------------------------------------------------------------------------------------------------------|--------------------------------------------------------------------------------------------------------------|-----------------------------------------------------------------------------------------------------------------------------------|-----------------------------------------------------------------------------------------------------------------------------------------------------------------------------------|---------------------------------------------------------------------------------------------|---------------------------------------------------------------------------------------------------------------------------------|
| Type of health facility                                          | Private                                                                                                                                                     | Private                                                                                                      | Private                                                                                                                           | Public                                                                                                                                                                            | Public                                                                                      | low-cost private                                                                                                                |
| Owned and managed                                                | Faith based                                                                                                                                                 | Private                                                                                                      | Private                                                                                                                           | Government                                                                                                                                                                        | Government                                                                                  | Private                                                                                                                         |
| Level of care                                                    | Secondary                                                                                                                                                   | Primary                                                                                                      | Secondary                                                                                                                         | Secondary                                                                                                                                                                         | Primary                                                                                     | Primary                                                                                                                         |
| Designation                                                      | Peri-Urban                                                                                                                                                  | Peri-Urban                                                                                                   | Peri-Urban                                                                                                                        | Urban                                                                                                                                                                             | Peri-Urban                                                                                  | Peri-Urban                                                                                                                      |
| Volume of deliveries                                             | >500                                                                                                                                                        | <500                                                                                                         | >1000                                                                                                                             | >5000                                                                                                                                                                             | <500                                                                                        | <500                                                                                                                            |
| Service departments                                              | Maternity, OPD, PMTCT, HIV/AIDS counselling, ANC, PNC, CWC, CHU, Full Lab, Theatre able to perform C-sections 24/7, Sick Newborn Care Unit, Inpatient Wards | Maternity, OPD, PMTCT, ANC, PNC, CWC, Family Planning, CHU, HIV/AIDS counselling, Basic Lab, Inpatient Wards | Maternity, OPD, PMTCT, ANC, PNC, CWC, Family Planning, CHU, Basic Lab, Inpatient Wards, HIV/AIDS counselling, performs C-sections | Maternity, OPD, PMTCT, ANC, PNC, CWC, Family Planning, CHU, CCC, Full Lab, Theatre able to perform C-sections 24/7, Sick Newborn Care Unit, Inpatient Wards, HIV/AIDS counselling | Maternity, OPD, PMTCT, ANC, PNC, CWC, Family Planning, CHU, Basic Lab, HIV/AIDS counselling | Maternity, PMTCT, OPD, ANC, PNC, Family Planning, CHU, Basic Lab, Inpatient Wards, HIV/AIDS counselling, Sick Newborn Care Unit |
| Professional staff                                               | Doctor, nurses, clinical officer                                                                                                                            | Nurse                                                                                                        | Doctors, nurses, clinical officers                                                                                                | Doctor, clinical officer, nurses                                                                                                                                                  | Nurse                                                                                       | Nurse                                                                                                                           |
| Electricity                                                      | Available                                                                                                                                                   | Available                                                                                                    | Available                                                                                                                         | Available                                                                                                                                                                         | Available                                                                                   | Available                                                                                                                       |
| Water                                                            | Available                                                                                                                                                   | Available                                                                                                    | Available                                                                                                                         | Available                                                                                                                                                                         | Available                                                                                   | Available                                                                                                                       |
| Hours of operation                                               | 24 Hours                                                                                                                                                    | 24 Hours                                                                                                     | 24 Hours                                                                                                                          | 24 Hours                                                                                                                                                                          | 8am-4pm                                                                                     | 24 Hours                                                                                                                        |
| Legend:                                                          |                                                                                                                                                             |                                                                                                              |                                                                                                                                   |                                                                                                                                                                                   |                                                                                             |                                                                                                                                 |
| * All secondary health facilities have cesarean section capacity |                                                                                                                                                             |                                                                                                              |                                                                                                                                   |                                                                                                                                                                                   |                                                                                             |                                                                                                                                 |
| OPD - Outpatient Department                                      |                                                                                                                                                             |                                                                                                              |                                                                                                                                   |                                                                                                                                                                                   |                                                                                             |                                                                                                                                 |
| PMTCT - Preventative Mother to Child Transmission                |                                                                                                                                                             |                                                                                                              |                                                                                                                                   |                                                                                                                                                                                   |                                                                                             |                                                                                                                                 |
| ANC - Antenatal Care                                             |                                                                                                                                                             |                                                                                                              |                                                                                                                                   |                                                                                                                                                                                   |                                                                                             |                                                                                                                                 |
| PNC - Postnatal Care                                             |                                                                                                                                                             |                                                                                                              |                                                                                                                                   |                                                                                                                                                                                   |                                                                                             |                                                                                                                                 |
| CWC - Child Welfare Clinic                                       |                                                                                                                                                             |                                                                                                              |                                                                                                                                   |                                                                                                                                                                                   |                                                                                             |                                                                                                                                 |
| CCC - Comprehensive Care Center for HIV                          |                                                                                                                                                             |                                                                                                              |                                                                                                                                   |                                                                                                                                                                                   |                                                                                             |                                                                                                                                 |
| CHU - Community Health Unit                                      |                                                                                                                                                             |                                                                                                              |                                                                                                                                   |                                                                                                                                                                                   |                                                                                             |                                                                                                                                 |
