# Supplementary material for: ‘We just look at the well-being of the baby and not the money required’: a qualitative study exploring experiences of quality of maternity care among women in Nairobi’s informal settlements in Kenya
Source: PubMed Central journal article supplement — BMJ Open. 2020 Sep 6;10(9):e036966. doi: 10.1136/bmjopen-2020-036966 (PMC7478011; doi:10.1136/bmjopen-2020-036966), 2020-09-06
Supplement: bmjopen-2020-036966supp002.pdf [file bmjopen-2020-036966supp002.pdf]

## **APPENDIX 2: FGD GUIDE**

Exploring attributes of women's preferences for place of delivery in Embakasi-North sub-County.

### **Purpose of FGD**

The purpose of this Focus Group Discussion is to try and understand where women residing within *Embakasi-North* deliver their babies and why they prefer these specific facilities. The study intends to specifically elucidate the following;

- 1) What women's preferences are with regard to place of delivery
- 2) Why they choose certain places or health facilities over the other
- 3) To determine attributes of the health system that they deem important
- 4) To determine possible attribute levels of the attributes identified

### **Logistical arrangements**

I would like to go over a few logistical arrangements before we begin the interview: Thank you for joining me today. My name is Jackline Aridi and I am a PhD student registered at Strathmore University at the Institute of Healthcare Management at the Strathmore Business School in Nairobi. The interview will last approximately 30- 45 minutes. I have obtained Ethical clearance to conduct this research from Strathmore University's Institutional Review Board (IRB) and permission to conduct research within Nairobi and Nakuru County from the National Science and Technology Research Institute (NACOSTI)

Everything we discuss during this interview will be kept in strict confidence and your real name will not appear in any of our results. As such, please make every effort to be open and honest when responding to the questions. I will provide you with a consent form which you will read and sign if you find it agreeable with you. For data capture purposes, this interview will be recorded using a mobile phone device. Start tape recording if consent is granted: (Facilitator to switch recorder on)

### **FGD Discussion Questions**

The questions fall into five key categories: Follow the guide below to lead the focus group discussion on the 5 key themes.

| <b>Key questions</b>                                                                  | <b>Probes</b>                                                                                                                                                                                                                                                                                                     |
|---------------------------------------------------------------------------------------|-------------------------------------------------------------------------------------------------------------------------------------------------------------------------------------------------------------------------------------------------------------------------------------------------------------------|
| 1. Birthing Experience -What are the things that make for a good birthing experience? | Describe your dream birthing experience.<br>Who needs to be present?<br>What needs to be present?<br>What are your worries or concerns?<br>Are there cultural traditions that need to be followed judiciously?<br>What makes you feel safe during the process?<br>What would absolutely make it a bad experience? |
| 2. Place of delivery -How did you and your family decide where to deliver?            | What are the options for places to deliver?<br>Who were involved in the decision making process as to where to deliver?                                                                                                                                                                                           |

|                                                                                                                            |                                                                                                                                                                                                                                                                                                                                                                                                                        |
|----------------------------------------------------------------------------------------------------------------------------|------------------------------------------------------------------------------------------------------------------------------------------------------------------------------------------------------------------------------------------------------------------------------------------------------------------------------------------------------------------------------------------------------------------------|
|                                                                                                                            | <p>Are you usually involved in deciding where to deliver? If so, what did you have to consider in making that decision? (cost, distance, risks, benefits)</p> <p>What makes the delivery place a good or bad experience? Were you treated nicely and with respect? Give examples.</p>                                                                                                                                  |
| 3. Recommendation to friends- What would you tell your friends about where they should deliver and why?                    | <p>Is it culturally appropriate to share your experiences with your friends?</p> <p>Does your opinion have an impact on where your pregnant friend delivers her baby?</p> <p>Does the Chief/leaders in your community recommend/suggest that you deliver at certain places?</p> <p>If you hear something negative about a place to deliver, does it affect where you choose to deliver?</p>                            |
| 4. Family Involvement -How did your family show support for you during pregnancy and delivery?                             | <p>Is your husband and extended family usually involved in the birthing experience?</p> <p>Which family members are actively involved in delivery?</p> <p>What roles do they play in the delivery process?</p>                                                                                                                                                                                                         |
| 5. Newborn Care -What are the things you believe make for the best environment for the newborn immediately after delivery? | <p>What are the traditional customs on how to handle and care for newborns?</p> <p>Does anyone help you care for the newborn? What makes them qualifies to do so?</p> <p>What do you believe is the best way to feed your newborn? And the timeline to starting solid foods?</p> <p>How do you keep your newborn warm?</p> <p>Do siblings play a role in taking care of newborns? If so, as soon as when? And how?</p> |

### Deriving Attribute Levels

Having delivered in health facilities and hospitals within Embakasi-North or Naivasha. Can you please speak on what you thought was the most important factors in selection of the facility where you choose to deliver. If I were to ask you to rank the list below, which of these factors did you think were most important in the selection of the health facility?

(Rank: Very important, somewhat Important, Not important)

- a. Cost of the health facility
- b. Availability of drugs
- c. Distance of the health facility
- d. Health provider attitude
- e. Quality of care (cleanliness etc.)
- f. Whether or not abuse and disrespect occurs during the delivery
- g. Time spent waiting for service
- h. Cost of transportation
